# Supplementary material
Source: Springer Nature journal article supplement (https://www.springermedizin.de/resource/supplementary/12881_2009_581_MOESM2_ESM.pdf/9450992)

A - 802

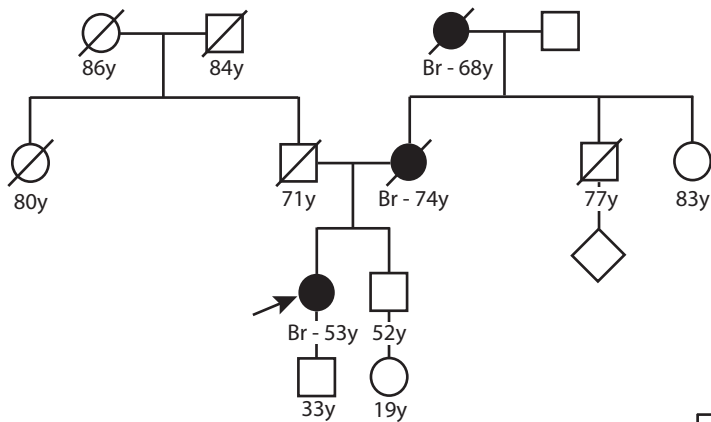

B - 1540

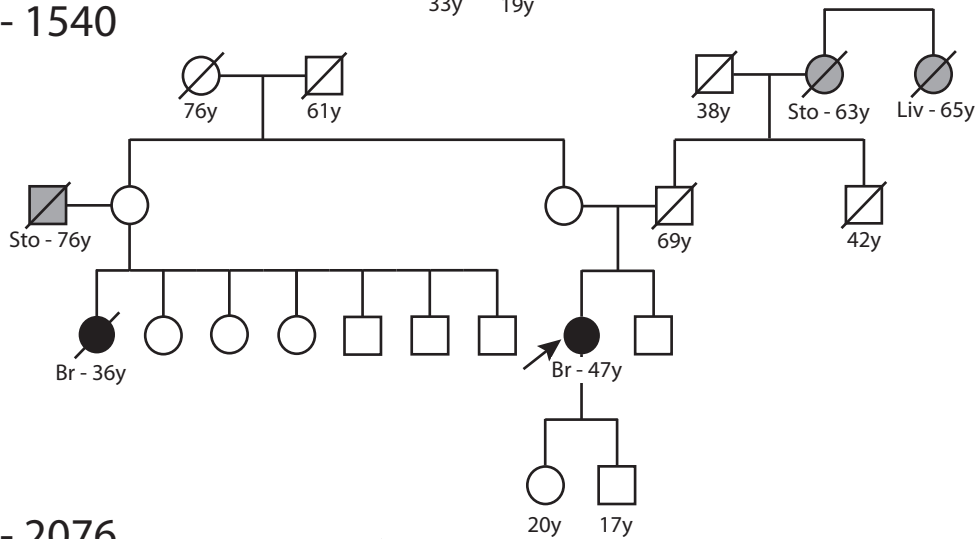

C - 2076

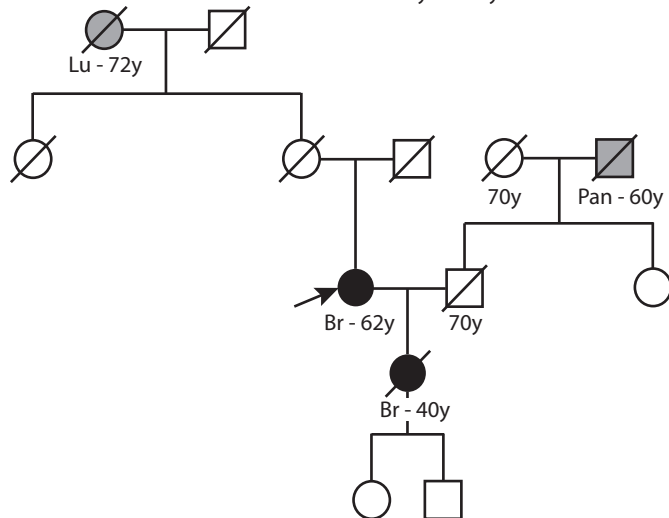

Supplement: MOESM2 [file 9450992]
